# Supplementary material for: Flotillin-1 palmitoylation is essential for its stability and subsequent tumor promoting capabilities
Source: Research Square preprint supplement (doi:10.21203/rs.3.rs-3487749/v1), 2023-10-29
Supplement: Supplementary file 1 [file 2a619296a9b8e73fa0e39cef.xlsx]

## Sheet: Figure 1 A. 
					FLOTILLIN-1	GAPDH	RATIO
				MDA-MB-231	78107	73714	1.0596
				BT-549	61023	55680	1.09596
				SUM-159	62576	52364	1.19502
				MDA-MB-459	71540	67523	1.05949
				MCF-7	15862	52109	0.3044
				MCF-10A	28654	60340	0.474876

## Sheet: Figure 1e
				PCR BAND INTENSITY
			Bio replicate	WT FLOTILLIN-1/GAPDH	C34A FLOTILLIN-1/GAPDH
			1	1.13	1.1
			2	1.23	1.17
			3	1.2	0.92
			AVERAGE	1.18667	1.06333
			SD	0.051316	0.12897
			T.TEST	T.Test (WT VS C34A)	0.198637
				WT	C34A

## Sheet: Figure 1f
	Hours	% protein remaining WT	% protein remaining C34A
	0	100	100
	1	60	30
	2	50	20
	4	40	0

## Sheet: Figure 1g
		TRIAL 1
			Cell	Condition	Flotillin-1	Vinculin	Ratio	FOLD
			WT	(-) CHX	40385.7	71119.2	0.567859	1
			WT	(+) CHX + DMSO	27642.1	47090.9	0.586996	1.0337
			WT	(+) CHX + MG-132	39247.2	65476	0.599413	1.05557
			WT	(+) CHX + CQ	22510.1	50694.2	0.444037	0.781949
			C34A	(-) CHX	26282.7	43184	0.60862	1
			C34A	(+) CHX + DMSO	16399.6	59597.1	0.275175	0.452129
			C34A	(+) CHX + MG-132	32737.6	53057	0.617028	1.01381
			C34A	(+) CHX + CQ	19179	41674	0.460215	0.460215
		Avg values
			(-) CHX	(+) CHX + DMSO	(+) CHX + MG-132	(+) CHX + CQ
		WT	1	1.0337	1.05557	0.781949
		C34A	1	0.452129	1.01381	0.460215
		TRIAL 2
			FLOT-1	GAPDH	RATIO	FOLD 1	FOLD 2	AVG	SD	T.TEST
		WT	17968.3	27616.5	0.650636	1	1	1	0	0.489355	DMSO
		WT	12781	32063.7	0.398614	0.612652	1.0337	0.823176	0.297725	0.315553	MG
		WT	29888.9	39259.3	0.761318	1.17011	1.05557	1.11284	0.0809968	0.569639	CQ
		WT	13798.7	39609.4	0.348369	0.535429	0.781949	0.658689	0.174316
		C34	13600.4	38719.1	0.351258	1	1	1	0	0.0113106	DMSO
		C34	7840.34	39981.5	0.196099	0.558276	0.452129	0.505202	0.0750574	0.0171137	MG
		C34	15288.9	38939.2	0.392634	1.11779	1.01381	1.0658	0.0735237	0.328018	CQ
		C34	4209.95	31747.4	0.132608	0.377522	0.460215	0.418868	0.058473
							0	0

## Sheet: Figure 2I
1	poly-ub	total flot	ratio	fold 1		FOLD 1	FOLD 2	FOLD 3	T.TEST
shcon	22692	30794	0.736897	1		1	1	1	0.048322
shDHHC5	27553	26527	1.03868	1.40953		1.4	2.3	1.6		SEM
2							AVG FOLD	SD		0
shcon	9158	19169	0.477751	1			1	0.472582	1.73205	0.272845
shDHHC5	20906	18894	1.10649	2.31604			1.76667
3
shcon	24737	20759	1.19163	1
shDHHC5	33686	18204	1.85047	1.55289

## Sheet: Fig. 3c
					weight (mg)
			mice #	ID	WT	C34A
			1	15	286	52.4		1	2
			2	16	307.9	88.4		1	2
			3	20	192.8	12.3		1	2
			4	21	193.5	13.9		1	2
			5	22	207	13.5		1	2
				T.test	0.000117407

## Sheet: Fig. 3I
MOUSE ID:	15		16		20		21		22
LUNG SLIDE #	GFP	dTom	GFP	dTom	GFP	dTom	GFP	dTom	GFP	dTom
1	15	0			3	0
2	0	0	0	0	11	0	3	0	5	0
3	6	0	9	0	6	0	0	0	8	0
		# of cells micromet foci observed
slide #	Mouse ID	WT	C34A		xvalue	xvalue
1	15	0	0		1	2
1	16	0	0		1	2
1	20	8	0		1	2
1	21	1	0		1	2
1	22	0	0		1	2
2	15	0	0		1	2
2	16	1	0		1	2
2	20	0	0		1	2
2	21	2	0		1	2
2	22	0	0		1	2
3	15	0	0		1	2
3	16	5	0		1	2
3	20	0	0		1	2
3	21	0	0		1	2
3	22	3	0		1	2
T.Test	0.0364473				1	2

## Sheet: Fig 3k
Mouse	Total Photon Flux
WT-1	100000000
WT-2	24900000
WT-3	948000000
C34A-1	2960000
C34A-2	3800000
C34A-3	24100000
C34A-4	4520000

## Sheet: Supplemental Fig 1b 
	1	2	Trial
A	1.355	1.633	1
B	1.33	1.358	2
C	1.267	1.396	3
D	1.118	1.468	4
		MCF-10A
		shCON	shFLOT-1
		0.106322	0.121706	SD
				For Graph:
Trial	shCON	shFLOT-1		AVG shCON	AVG shF1
1	1	1.20517		1	1.16027
2	1	1.02105
3	1	1.10182
4	1	1.31306
	0.0854266	T.test

## Sheet: Supplemental Fig 1c
Trial	WT	C34A
1	0.11	0.088
2	0.12	0.093
3	0.107	0.097
AVG	0.112333	0.0926667
	WT	C34A
SD	0.00555778	0.00368179
T.TEST	0.0599325
	WT	C34A

[truncated: 5 more sheets: Supplemental Fig 2b 231, Supplemental Fig. 2b 159, Supplemental figure 3a, Supplemental Fig. 3e, Supplemental Fig. 4a]
