# Supplementary material for: Flotillin-1 palmitoylation is essential for its stability and subsequent tumor promoting capabilities
Source: Research Square preprint supplement (doi:10.21203/rs.3.rs-3487749/v1), 2023-10-29
Supplement: Supplementary file 2 [file 8b9907b27987f525ef5317b1.docx]

**Supplementary Methods:**

**Data and code availability**

Bulk RNA-seq has been data has been deposited at GEO under the accession number **GSE236971,** which will be accessible upon the publication of this study. All the code used in the analysis of the RNA-seq data was already established from various R studio packages listed in RNA-seq data analysis. Any additional information or data will be made available upon request.

**Cell Culture**

MDA-MB-231, SUM-159, and HEK 293T were purchased from ATCC and cultured in DMEM + 10% FBS + 1x Anti-Anti. MCF-7 were purchased from ATCC cultured in DMEM + 10% FBS + 10ug/ml insulin + 1x Anti-Anti. MCF-10A were purchased from ATCC and cultured in DMEM + 10% FBS + .5 mg/ml hydrocortisone + 20 ng/ml EGF+ 10ug/ml insulin+ 100 ng/ml cholera Toxin + 1x Anti-Anti. All cells were routinely tested for mycoplasma by PCR test. Cells were grown in an incubator at 37 ̊ C + 5% CO2 with maintained humidity. Upon initial acquisition, cell lines were passaged 2-4 times prior to generating large amounts of aliquots for freezing and storage in liquid nitrogen. Upon thawing, cells were not passaged more than 20 times.

**Animal Experiments**

All experiments were conducted within AAALAC guidelines and were approved by the University of Texas Institutional Animal Care and Use Committee (Protocol No. AUP-2022-00082). Six-to-eight week old FOX Chase SCID Beige mice (Charles River laboratories, strain code: 250) were injected bilaterally with 1x105 WT or C34A flotillin-1 expressing MDA-MB-231 shFlotillin-1 3` UTR cells also labelled with GFP and dTomato reporters, respectively. The cells were suspended in a 1:1 ratio of PBS to Matrigel (50ul PBS: 50ul Matrigel) and injected orthotopically into the 4th mammary fat pad. Tumor diameter and mouse weight was monitored bi-weekly to ensure there were no significant changes in weight or that the tumor diameter did not exceed 1.5 cm. After 8-weeks of growth, animals were euthanized, and tissues were processed for imaging as described in the immunofluorescence section.

For experimental lung metastasis experiments, .5x10 6 MDA-MB-231 shFlotillin-1 3` UTR cells expressing flotillin-1 C34A or WT constructs along with a luciferase reporter lentiviral vector were injected into the lateral tail vein of six-to-eight week old SCID Beige (Charles River laboratories) . Mice were injected with intraperitoneally 150 ul of D-luciferin in sterile PBS (30mg/ml) and anesthetized with 3% isoflurane prior to BLI images using the IVIS. Images were taken at day 0, 7, 14, 21, and 28 in mice. Lungs were then removed and placed in 12-well dishes containing PBS for *Ex Vivo* lung imaging on day 28. Images were analyzed using IVIS living imaging software.

For doxycycline-induced flotillin-1 peptide experiments, 1x106 MDA-MB-231 or SUM-159 luciferase-mCherry along with either F1C or F1A (control) peptide expressing cells were injected into the #4 mammary fat pad of six-to-eight week old SCID Beige mice at a 1:1 ratio of PBS: Matrigel. Upon palpable tumor establishment, mice were switched to a diet consisting of 200 mg/kg of doxycycline. Luciferase images were obtained weekly by IP injection of 150 ul of PBS solution containing 30mg/ml of D-luciferin.

**Fluorescence Activated Cell Sorting**

Primary tumors were minced with a scalpel and placed in DMEM containing 2mg/mL of collagenase A + 100 units of DNase I. Tumors were digested at 37 ̊ C for three hours and then passed through a 70 µM nylon cell strainer to create a single cell suspension. To isolate lungs from mice for mCherry+ cancer cell quantification, lungs were minced with a razor blade and placed in a 6-well dish containing 5mL of digestion medium consisting of 2mg/mL collagenase A + .25mg/ml of hyaluronidase+100 units of DNAse I in DMEM + 10% FBS and incubated at 37 º C for 1 hour in a shaking incubator. Cell suspension was then filtered through a 40-uM cell strainer, spun down, and resuspended in 1ml of ACK red blood cell lysis buffer for 5 minutes at room temperature to lyse red blood cells.

Both cell suspensions from primary tumors or lungs were then spun down and re-suspended in PBS + 2% FBS. Non-fluorescent parental MDA-MB-231 cells as well as digested lungs from non-tumor bearing mice were also suspended in the same buffer and used as non-fluorescent controls. Cell sorting was performed using a BD FACS Aria Fusion at the Center for Biomedical Research Support Microscopy and Imaging Facility at UT Austin (RRID# SCR_021756). Gating strategies can be found in the supplemental information.

**Plasmid Constructs, Cloning, Mutagenesis**

pEGFP-SF2 was a kind gift from Tom Misteli (Addgene #17990). dimericTomato-2xrGBD was a kind gift from Dorus Gadella (Addgene #176098). pCMV-GFP (was a kind gift from Dr. Ryan Gray). To generate pFlotillin-1-GFP and pFlotillin-1-Cysteine-34-Alanine-GFP constructs, flotillin-1 full-length mRNA (UniProt # 075955) was reverse transcribed using the Ultra script 2.0 cDNA synthesis kit (PCR Biosystems, #PB30.32-02). The full-length cDNA was then amplified with Phusion Plus Polymerase master mix and primers (listed in supplementary materials table 1.) according to manufactures instructions. Fragment 1 was amplified for the wild type flotillin-1 and two fragments for the C34A mutant both from full-length cDNA. For flotillin-1 C34A, the first fragment contained the mutation at cysteine 34 and the second fragment contained the remaining flotillin-1 CDS (see primers listed in supplementary materials Table 1.). Both wild type and C34A fragments were confirmed by gel electrophoresis and purified along with the HIND III and PstI digested pEGFP-SF2 vector. PCR fragments along with the digested vectors were subjected to the HIFI DNA assembly reaction according to manufactures instructions. 2ul from each reaction was transformed into DH5α competent cells. For generation of lentiviral constructs, the pFlotillin-1-GFP or pFlotillin-1-C34A-GFP constructs were used as templates for PCR using primers specific (Supplementary Table 1.) Flotillin-1-GFP, flotillin-1-C34A, or dTomato constructs were amplified by PCR (primers in supplementary table 1.) and cloned into a xbaI-SalI digested pCMV-GFP-hygro vector (Addgene #17446) by HIFI DNA assembly to create flotillin-1-GFP and flotillin-1-C34A-dTomato lentiviral constructs. For GFP-F1 peptide constructs, gBlocks from Integrated DNA technologies were synthesized to represent the CDS DNA sequence encoding amino acids 23-41 of the flotillin-1 (UniProt #O75955) with or without a cysteine to alanine mutation at residue 34. This synthetic DNA also harbored 40 bp homology ends to XbaI-BamHI digested pCMV-hygro vector (Addgene, #17446) or XhoI-BamHI digested doxycycline inducible GFP vector (all vectors used are listed in detail in the supplemental materials table). For all assembly reactions, either synthetic DNA gBlocks or purified PCR amplified fragments were combined with gel purified digested vectors at a insert to vector molar ratio of 10:1 for gBlocks or 2:1 for flotillin-1 full length fragments, incubated at 50 ̊ C with the HIFI DNA assembly reaction mix for 1 hour and transformed into NEB stable competent cells. All plasmid sequences were confirmed by sanger sequencing.

**Transfections**

Plasmids were transiently transfected using lipofectamine 3000 according to manufactures instructions. For 6 well dishes, 2ug of plasmid was used and 10 ug for 100 mm plates. Media was replaced after 6 hours of transfection and protein expression was analyzed 48 hours post-transfection.

**Lentiviral Generation and Stable Cell Line generation**

To generate lentiviral particles 5ug of transfer lentiviral vector was combined with 2nd generation packaging plasmids, 3.3 ug pPAX.2 (Gift from Dr. Ryan Gray) and 1.7 ug pMD2.g in sterile, nuclease free water up to 500ul. 62ul of 2M CaCl2 was added to the plasmid mix. 500 ul of 2xHepes buffer saline (HBS) was then added in a dropwise fashion and the tube was mixed vigorously. 100 mm dishes of HEK 293T cells were incubated for one hour with 25 uM chloroquine in DMEM before being transduced with the above mixture. Cells were transfected with the mixture for 7-12 hours after which the medium was replaced. 24 hours after transduction, fresh medium was applied, and viral supernatant collected after an additional 24 hours. and filtered through .45 µM filter. Filtered supernatant was incubated with lenti-pac lentivirus concentrator solution at a 4:1 ratio and kept on ice for 3 hours. The viral pellet was then suspended in cold 100 ul of PBS and aliquoted for storage at -80 until further use. Cells were then seeded into 6-well plates and medium was replaced with DMEM containing 8ug/mL of polybrene. To generate flotillin-1 WT and C34A stable cell lines, cells were first transduced with flotillin-1 3` UTR shRNA particles and selected with puromycin (2ug/ml) . Once the cell lines were stable, flotillin-1 deficient cells were transduced with either flotillin-1-GFP or flotillin-1-C34A-dTomato lentiviral particles and selected with hygromycin (400 ug/ml) for at least two weeks. These cells were transduced to express additional flotillin-1 independent GFP or dTomato proteins from empty lentiviral vectors for cell tracking *in vivo.* Blasticidin (5ug/ml) was used to select for stable integration. For tail vein metastasis, flotillin-1-GFP or flotillln-1 C34A cells were transduced with luciferase lentiviral particles and selected with blasticidin prior to tail vein injection.

**Reverse Transcription-PCR**

RNA was harvested from cells using Pure link RNA miniprep kit according to manufacturer’s instructions. RNA was then diluted in nuclease-free H20 and normalized to a final concentration of 1000 ng in 10 ul. 10 ul of superscript IV reverse transcriptase master mix was then added to the RNA and reverse transcribed according to manufacturer’s instructions. The resulting cDNA was diluted 5-fold in nuclease free water. 2 ul of diluted RT reaction was then added to 18 ul of Taq or Phusion PCR master mix containing forward and reverse primers (listed in supplemental materials table 1) at final concentration of .2-5 µM each. Resulting PCR products were then separated on an agarose gel in 1xTAE buffer pre-cast with SYBR safe dye. Bands were visualized using a Syngene imaging system.

**MTT viability Assay**

Cells were seeded at a density of 5x103 in 96 well plates. After a 24-hours, 100ul of 3-(4,5-Dimethylthiazol-2-yl)-2,5-diphenyltetrazolium bromide (MTT reagent) diluted in PBS (5 mg/ml) was added to each well. After two hours of incubation at 37 °C, the media were removed and 100 uL DMSO added to each well. Absorbance was read at 570 nm on a spectrometer. Data shown represent the average of three independent experiments.

**Immunofluorescence**

For *in vitro* Immunofluorescence, cells were seeded on 8-well chamber slides and the following day fixed with 3.7% paraformaldehyde at room temperature for 15 minutes. Following fixation cells were permeabilized with .5% triton-x-100 for 20 minutes and blocked in blocking buffer (10% FBS, 2% BSA, .2% triton-x-100) for one hour at room temperature. Primary antibodies were diluted in dilution buffer (2% FBS, 2% BSA, .2% triton-x-100) and incubated overnight at 4 ̊ dC. Slides were then washed three times in PBS for 5 minutes each and incubated with secondary antibodies in dilution buffer for 2 hours at room temperature. Slides were washed three times in PBS and mounted in prolong gold antifade medium containing DAPI.

For *in vivo* immunofluorescence, primary tumors were incubated in 4% paraformaldehyde, while lungs 1% paraformaldehyde for 6 and 4 hours at 4 ̊C, respectively. Fixed tissues were then placed in 25% sucrose overnight at 4 ̊C. Tissues were embedded in O.C.T and frozen at -80 ̊C. Frozen tissues were cut into 20 µM section, placed on super frost gold slides, and allowed to dry for 4 hours to overnight. O.C.T was removed by washing three times in PBS and permeabilized for 1 hour in .5% triton-X-100. Permeabilized slides were blocked at room temperature for two hours before being incubated with primary antibodies overnight at 4 ̊ C. Slides were washed three times for 5 minutes each in PBS before being incubated with secondary antibodies in dilution buffer for 2 hours at room temperature. Slides were then washed three times for 5 minutes each in PBS. Slides were mounted in mounting medium containing DAPI.

Image J was used for colocalization analysis by using the colocalization threshold function [1].

**Immunohistochemistry**

To detect Ki67 and cleaved-caspase 3 in fixed-frozen tissue sections, 5 μM frozen tissue sections on super frost gold slides were allowed to thaw at room temperature for 30 minutes to an hour prior to being washed in PBS three times for 5 minutes each. Washed slides were then blocked in .3% H202 solution in PBS for ten minutes to block endogenous peroxidases. Following two PBS washes, the slides were then blocked for 2 hours at room temperature in the same antibody blocking buffer as the previous immunofluorescence section. Following the blocking step, slides were placed in a modified humidity chamber and incubated overnight at 4 ̊ C with Ki67 (1:100) or Cleaved-Caspase 3 (1:100) antibodies diluted in the same antibody dilution buffer as the previous Immunofluorescence section. Following primary antibody incubation, slides were washed three times in PBS for 5 minutes each and incubated with biotinylated rabbit IgG (1:100) for 30 minutes at room temperature. The slides were again washed as described previously and incubated with streptavidin-HRP for an additional 30 minutes. After two additional PBS washes for 5 minutes each, the slides were incubate with diluted DAB substrate according to manufacturer’s instructions until signal development. The slides were then washed with PBS and subjected to hematoxylin staining for 2 minutes followed by washing with tap water for 15 minutes. Washed slides were then dehydrated in a gradient ethanol bath (95%, 95%, 100%, 100%) for 5 minutes each. Slides were then cleared in xylene and mounted with aqueous mounting medium.

**Ubiquitylation and protein stability detection**

To detect for poly-ubiquitylation, cells were lysed in 1% SDS lysis buffer supplemented with or without tandem ubiquitin binding entities (TUBE) conjugated to biotin (Life Sensors, # UM-0301-0200) at a final concentration of 100 ug/ml. Lysates were incubated for 15 minutes at 4 ̊ C and centrifuged for 10 minutes at 10,000 rpm. Supernatants were normalized to 100 ug of protein, diluted 10-fold in PBS and enriched overnight with strep-avidin magnetic beads. Beads were then washed three times with 1% SDS in PBS, suspended in 4X sample loading buffer, and heated at 95 ̊ C for ten minutes before being subjected to SDS-PAGE. For protein stability, cells were seeded into 6-well plates and incubated with 100 ug/ml of cycloheximide for the desired time points before being lysed in 1% SDS lysis buffer. Additional rescue experiments included a cycloheximide treatment 100 ug/ml for 4 hours after 4 hours of pre-treatment with MG-132 (20 µM) or chloroquine (20 µM) for a total of 8 hours prior to being harvested with 1% SDS lysis buffer. To strip the membranes of antibodies and re-probe for additional proteins, membranes were washed for 5 minutes in TBST and incubated with restore western blot stripping buffer (Thermo Scientific, #21059) buffer for 30 minutes with agitation at room temperature. Membranes were then re-blocked for 1 hour, briefly washed with TBST, and re-probed with a different antibody overnight. In some cases, the primary antibody was not completely removed, resulting in multiple bands. The correct bands have been highlighted in the additional supplemental document containing full membrane images.

**Invasion Chamber**

MDA-MB-231 cells stably expressing flotillin-1 WT or C34A were diluted to 1x106 cells/ml in serum-free medium. 24-well invasion chamber well inserts were pre-coated with Collagen I (2mg/mL) for 24 hours at 37 ̊C for polymerization. 500 uL of full-growth medium was then added to the bottom of each well as a chemoattractant and 300 ul of each cell suspension in serum-free medium added to the collagen I coated insert. Diluted cells were then added to the inserts (300 ul per well) and incubated for 24 hours. The following day, medium was aspirated from the inserts and fixed with 3.7% paraformaldehyde for two minutes. The inserts were then washed with PBS once and permeabilized with 100% methanol for 20 minutes. After permeabilization, the inserts were washed in PBS and stained with Crystal Violet for an additional 20 minutes. Inserts were washed an additional two times in PBS. After washing, the top of the inserts (non-invaded cells) were removed with an cotton swab. Invaded cells were then imaged using an inverted microscope at random regions of interest. To ensure that regions of interest were not biased, invasion was quantified by de-staining the entire bottom insert with 10% acetic acid for 30 minutes at room temperature. The distaining solution was then transferred to a 96 well plate and read at 570 OD for an unbiased quantification of invasion.

**Western Blotting**

Protein lysates were lysed in a 1% SDS lysis buffer containing 2 mM EDTA and 20mM Tris-HCl (PH 6.8) for 5 minutes and scraped into 1.5 mL collection tubes. Lysates were sonicated using horn sonification for 3x20 seconds each and allowed to recover on ice in between each sonification. Lysates were centrifuged for 5 minutes at 10,000 rpm at 4 ̊C and supernatants subjected to protein quantification by BCA assay. Lysates were then diluted to 50 ug, resolubilized in 4X SDS loading buffer (200mM Tris-HCL, 6.8 PH, 8% SDS, 40% glycerol, .4% bromophenol blue) and boiled at 95 ̊ C for 7 minutes. Boiled samples were resolved on a 10% SDS-PAGE gel and transferred to a nitrocellulose membrane. Transferred membranes were blocked for 1 hour in 5% non-fat dairy milk (NFDM). Blocked membranes were washed with 1X tris buffer saline + .1% tween-20 (TBST) prior to the addition of the diluted primary antibody overnight at 4 ̊C (Found in supplementary table 1.). The following day, membranes were washed thrice with TBST for 5 minutes each prior to the addition of rabbit (1:3000) (Cell Signaling Technologies, #7074) or mouse IgG (1:5000) secondary horse radish peroxidase (HRP) conjugated antibody diluted in 5% NFDM for 1 hour. Membranes were washed thrice in TBST and developed by the addition of West Super Atto substrate. Images were obtained using an Sygene Imaging system.

**Click Chemistry**

A modified version from the established protocol [2] was utilized for click chemistry analysis. Briefly, cells were grown to 80% confluence in 100 mm dishes and replaced with serum-free medium containing 25 μM of 17-Octodecanoyic Acid (17-ODYA) (Cayman Chemicals, #90270) or DMSO for 8 hours. Cells were lysed in 1% SDS lysis buffer + 50 mM Tris-HCL (1X SDS buffer). Cells were incubated in 500 ul of buffer on ice for 30 minutes and transferred to 1.5 mL tubes. Lysates were sonicated with a probe sonicator for 3x20 seconds on ice. Lysates were centrifuged 10,000 rpm for 5 minutes and supernatants subjected to BCA assay (Thermo Scientific, #23227) for protein concentration. Lysates were diluted to 1mg/ml and chloroform/methanol precipitated. Cell pellets were resolubilized in 50 ul of 1XSDS buffer and subjected to click chemistry reaction with click chemistry protein reaction kit (Click Chemistry Tools, #1262). Briefly, 50 ul of lysate was added to reaction buffer containing 40 μM of Azide Biotin (Click Chemistry Tools, #1265-5). The reaction was incubated for 30 minutes with rotation at room temperature protected from light. Excess Biotin was removed by an additional chloroform/methanol precipitation. Copper-free click chemistry was also performed by incubating cells in serum free medium containing 25 µM of Azido palmitic acid or DMSO (Click chemistry tools) for 8 hours. Cells were washed twice with PBS prior to additional serum free medium treatment containing 40 µM of DBCO-Biotin for one hour. Medium was removed and cells washed with PBS prior to harvesting with 1% SDS lysis buffer as described in the copper catalyzed click chemistry. For streptavidin enrichment of proteins from both copper free and copper catalyzed click chemistry biotin labeling, protein pellets were again resolubilized with 100 ul of 1xSDS buffer. 10 ul were kept as a 10% input and the remaining 90 ul were diluted 10x in PBS prior to being incubated with pre-washed Pierce streptavidin agarose (Thermo Scientific, #20349) (20 ul per sample) overnight (8-12 hours) with rotation at 4 ̊ C. The following day lysates were washed three times with 1X SDS buffer. Resins were then resolubilized in 15ul of 1XSDS lysis buffer and heated to 95 ̊ C for 10 minutes to elute proteins from resin. Supernatants were resolved on a 10% SDS-PAGE and subjected to western blot analysis.

**Bulk-RNA Sequencing**

GFP+ and dTomato+ MDA-MB-231 cells in Fig. 3 were FACS-sorted into DMEM medium containing 10% FBS. Cells were normalized to 100,000 cells per tumor and spun down at 5,000 rpm at 4°c for ten minutes. Cell pellets were then re-suspended in RNA lysis buffer and subjected to RNA extraction using Life sciences RNA extraction kit according to manufacture’s instructions. Isolated RNA in nuclease-free water was then kept at -80 until further processing. Frozen RNA was shipped on dry ice and submitted to GENEWIZ for bulk-RNA sequencing.

**Analysis of Bulk RNA-seq Data**

GENEWIZ performed initial data processing by assessing quality control and generating gene count matrices. The gene count matrices were filtered based on total read count ( 10 total counts in all conditions) and p-value ( .05). DESeq2 was then performed to normalize the gene counts and create a differential gene expression matrix in R as described previously [3]. The resulting gene expression values from the DESeq2 output were visualized using the Bioconductor EnhancedVolcano package in R studio [4]. Gene ontology was performed using gene names after filtering differentially expressed genes by adjusted p-values <.05 and absolute Log2Fold changes of +/- 1.5. The filtered gene names in excel were submitted to GOrilla to generate gene ontology biological functions [5]. Gene set enrichment analysis was performed using a ranked ordered gene expression set based on log2FoldChange from DESeq2 output in R studio using the clusterProfiler Bioconductor package [6] and selecting “BP” or biological pathways as the ontology. The gene signature for TNBC lung metastasis was obtained from the following publication [7]. Genes overlapping the TNBC lung metastasis signature were converted to Z-scores values and visualized by heatmap in R studio using ComplexHeatmap and colorRamp2.

**Acyl-Biotin Exchange**

Acyl-biotin exchange was performed as a modified version from the previous protocol [8]. Tumors were homogenized in in 1mL of lysis buffer containing (100 mM Tris-HCL, PH 7.2, 5mM EDTA, 150mM NaCl, 2.5% SDS, and 50 mM of *N*-ethylmaleimide (NEM), 50U/ml of nuclease, and 1X halt protease inhibitor cocktail. Samples were then incubated 3 hours at room temperature with rotation. After incubation, lysates were centrifuged for 10 minutes at 16,000*g*. Supernatants were subjected to BCA protein assay for quantification of protein concentration. Lysates were diluted to 1mg/mL and precipitated by chloroform/methanol precipitation. Precipitated protein was resolubilized in 500 ul of lysis buffer containing .5 mM of HPDP-Biotin (Cayman Chemicals, #16459) and divided into two parts. One part was incubated with Tris-Hcl ph 7.2 (-NH2OH) and the other part with 1M final concentration of Hydroxylamine (+NH2OH) (Millipore Sigma, #438227) for 3 hours at room temperature protected from light with rotation. Lysates precipitated by chloroform/methanol and resolubilized in 200ul of re-solubilization buffer (100 mM Tris-HCL 7.2 PH, 2% SDS, 8M Urea, 5mM EDTA). 20 ul from each 200 ul sample was used as an input with the remaining sample diluted 10x with PBS. 20 ul of pre-washed streptavidin agarose (Thermo Scientific, #20349) was added to each lysate and incubated overnight at 4 ̊ C with rotation. Lysates were then washed three times with 1% SDS in PBS. Resins were then solubilized in 15 ul of 4X SDS loading buffer and eluted by boiling at 95 ̊C for 10 minutes. Supernatants were resolved on a 10% SDS-PAGE and subjected to western blot.

**Peptide Treatments**

CPP and CPP-F1 peptides were synthesized by ABclonal and delivered as a lyophilized powder. The peptides were re-suspended in sterile nuclease-free water to make a concentrated stock of 1200 uM and 500 uM, respectively. The peptides were then aliquoted and stored at -80 protected from light until use. Peptides were added to culture medium at desired concentrations for 24 hours for in vitro treatments.

For *in vivo* peptide treatments, CPP-F1 peptide was diluted to a concentration of 1ug/ul in sterile H20 and intraperitoneally I.P. injected into tumor bearing SCID beige mice at a concentration of 150ug/mouse (150ul). Mice received I.P. injections of 150ul of water for the water only controls.

**Statistical Analysis**

Data are represented as mean SD or SEM. *P* values in the study were calculated by performing two-sided Students t-test. Differences between the two groups were significant if the *P* value was below 0.05. Pearson’s Correlation coefficient was also performed using NIH Image J software to detect colocalization. Due to unequal sample sizes of the mice in figure 3, a Mann-Whitney *U*-test was performed instead of a two-sided students t-test.

**Supplemental References:**

1. Adler, J. and I. Parmryd, *Colocalization analysis in fluorescence microscopy.* Cell Imaging Techniques: Methods and Protocols, 2013: p. 97-109.

2. Wegleiter, T., et al., *Palmitoylation of BMPR1a regulates neural stem cell fate.* Proceedings of the National Academy of Sciences, 2019. **116**(51): p. 25688-25696.

3. Varet, H., et al., *SARTools: a DESeq2-and EdgeR-based R pipeline for comprehensive differential analysis of RNA-Seq data.* PloS one, 2016. **11**(6): p. e0157022.

4. Blighe, K., S. Rana, and M. Lewis, *EnhancedVolcano: Publication-ready volcano plots with enhanced colouring and labeling* [*https://github*](https://github)*. com/kevinblighe.* EnhancedVolcano2018, 2018.

5. Eden, E., et al., *GOrilla: a tool for discovery and visualization of enriched GO terms in ranked gene lists.* BMC bioinformatics, 2009. **10**(1): p. 1-7.

6. Wu, T., et al., *clusterProfiler 4.0: A universal enrichment tool for interpreting omics data.* The innovation, 2021. **2**(3).

7. Taftaf, R., et al., *ICAM1 initiates CTC cluster formation and trans-endothelial migration in lung metastasis of breast cancer.* Nature communications, 2021. **12**(1): p. 4867.

8. Niu, J., et al., *Fatty acids and cancer-amplified ZDHHC19 promote STAT3 activation through S-palmitoylation.* Nature, 2019. **573**(7772): p. 139-143.

**Supplemental Data:**

***Supplementary Figure* 1: Altering flotillin-1 protein levels in MCF-10A and MDA-MB-231 through RNAi.**

***Supplementary Figure* 1: Altering flotillin-1 protein levels in MCF-10A and MDA-MB-231 through RNAi.**  (A) Apoptosis detection in MCF-10A cells stably expressing control (shCON) or flotillin-1 shRNA (shF1) constructs by cleaved-PARP detection in western blot. (B) Cell viability analysis by MTT assay in control (shCON) or flotillin-1 (shFLOT-1) shRNA. (C) Cell viability analysis by MTT assay in WT or C34A flotillin-1 expressing MDA-MB-231 cells. (D) Flotillin 1 and 2 expression analysis in control and flotillin-1 shRNA MDA-MB-231 cells. (E) Flotillin-1 and 2 expression analysis in MDA-MB-231 cells expressing WT or C34A flotillin-1.

***Supplementary Figure 2:* Altering flotillin-1 palmitoylation affects its stability in TNBC.**

***Supplementary Figure 2:* Altering flotillin-1 palmitoylation affects its stability in TNBC.** (A) Detection of palmitoylated flotillin-1 by copper free click chemistry. MDA-MB-231 cells were treated with 25 µM azido palmitic acid or DMSO ( - Azido-palmitate) for 6 hours. After 6 hours medium was replaced with medium containing 40µM DBCO-biotin for an additional hour. Lysates were then enriched by streptavidin beads overnight and subjected to western blotting analysis using a flotillin-1 antibody. (B) Detection of endogenous flotillin-1 palmitoylation after treating with or without global palmitoylation inhibitor (2-bromopalmitate or 2-BP) 50 µM for 24 hours with or without proteasomal inhibitor (MG-132) (20µM) for 8 hours. Flotillin-1 was detected by western blotting. Graphs were constructed by averaging the flotillin-1 band intensity normalized to GAPDH from three trials. Students two-sided T-test were used for statistical significance. (C) Flotillin-1 and ubiquitin protein expression were assessed in flotillin-1-C34A expressing MDA-MB-231 cells in response to various concentrations of MG-132 or DMSO for 8 hours. Flotillin-1 and ubiquitin protein were detected using antibodies. A vinculin antibody served as loading control. (D) The efficacy of chloroquine (CQ) treatment was assessed using an autophagy marker LC3 A/B antibody with or without 20 µM of chloroquine treatment for 8 hours. GAPDH served as the loading control. (E) Immunofluorescence of flotillin-1-C34A-dtomato coupled with ER marker, calreticulin, and Golgi marker, GM-130. Calreticulin and GM-130 were visualized with anti-rabbit-CY5 conjugated secondary antibodies pseudo-colored white. Nuclei were stained with DAPI.

***Supplementary Figure 3:* Depleting zDHHC5 affects endogenous flotillin-1 stability.**

***Supplementary Figure 3:* Depleting zDHHC5 affects endogenous flotillin-1 stability**. (A) shRNA knockdown efficiency and specificity for was tested by performing RT-PCR in shControl, shzDHHC5, shzDHHC17, and shzDHHC21 MDA-MB-231 cells. RNA was reverse transcribed, and cDNA amplified with primers for zDHHC17, zDHHC21, and actin. mRNA was normalized to actin and expressed as a fold change to shControl mRNA. (B) shRNA knockdown efficiency and specificity was assessesed by western blotting shControl, shzDHHC5, shzDHHC17, and shzDHHC 21 expressing MDA-MB-231 cells using a zDHHC5 and GAPDH antibody. (C) Knockdown efficiency for zDHHC5 was tested in MDA-MB-231 and SUM-159 control (shCon) and zDHHC5 (shzD5) shRNA expressing cells by western blotting with zDHHC5 and GAPDH antibodies. (D) Specificity of zDHHC5 shRNA for reducing palmitoylation of two known substrates was tested by performing click chemistry palmitoylation detection in scontrol (shCON), shzDHHC5, shzDHHC17, and shzDHHC 21 expressing MDA-MB-231 cells. Palmitoylation status of EZH2 and flotillin-2 were detected by western blotting with EZH2 and flotillin-2 antibodies against the pulled down biotinylated proteins after overnight streptavidin enrichment. Total EZH2 and flotillin-2 were detected by western blotting the lysates prior to streptavidin enrichment. (E) Viability of zDHHC5 vs control shRNA expressing MDA-MB-231 was assessed by MTT assay. Students T-test was performed for statistical analysis.

***Supplementary Figure 4:* Flotillin-1 palmitoylation affects tumor progression in vivo.**

***Supplementary Figure 4:* Flotillin-1 palmitoylation affects tumor progression in vivo.** (A) Invasive capacity *in vitro* between WT and C34A expressing flotillin-1 MDA-MB-231 cells was assessed by collagen-1 coated 8 µM membrane inserts. Cells were seeded in the top chamber in serum free medium and allowed to invade overnight using 10% FBS as the chemoattractant in the lower chambers. Invaded cells were stained with crystal violet and quantified by de-staining with 10% acetic acid for 30 minutes. Distained crystal violet was quantified by absorbance reading at 570 nm. (B) RNA-seq analysis using isolated RNA from sorted GFP+ (flotillin-1 WT) and dTomato+ (flotillin-1 C34A) tumors. Heatmap of differentially expressed genes from the RNA-seq analysis. Differentially expressed genes were analyzed by C34A vs WT tumors (n=2) and defined by an absolute log2fold change of ± 1 and a p-adjusted value of < .05 (C) Gene set enrichment using differentially expressed ranked genes from C34A vs WT. normalized enrichment score is listed as “NES” on the enrichments plots. (D) Enriched Down-regulated terms in C34A vs WT using gene ontology biological processes. (E) Enriched Up-regulated terms in C34A vs WT using gene ontology biological processes.

***Supplementary Figure 5:* Modulating flotillin-1 palmitoylation through peptide delivery affects flotillin-1 palmitoylation and tumor progression.**

***Supplementary Figure 5:* Modulating flotillin-1 palmitoylation through peptide delivery affects flotillin-1 palmitoylation and tumor progression.**(A) Analysis of GFP-peptide fusion expression in control (F1A) or flotillin-1 targeting (F1C) cells. Expression upon doxycycline (DOX) administration for 24 hours. Expression was assessed by GFP western blotting. (B) Flotillin-1 protein expression analysis by western blotting after 24 hours doxycycline (1ug/ml) exposure. (C) Flotillin-1 palmitoylation with or without doxycycline administration for 24 hours. Cells were labelled with 25 μM 17-ODYA in serum free medium with or without 1ug/ml doxycycline for 24 hours prior to click chemistry analysis and flotillin-1 western blotting. (D) Tumor bioluminescence (BLI) in MDA-MB-231 xenografted tumors expressing either control (F1A) or targeting (F1C) inducible peptide constructs. BLI was expressed as a fold change to week 1 tumor BLI. Doxycycline was administered upon palpable tumor formation at week 2 of growth.

***Supplementary Figure 6:* Analysis of flotillin-1 targeting peptide expressed in SUM-159 cells and xenografted tumors.**

***Supplementary Figure 6:* Analysis of flotillin-1 targeting peptide expressed in SUM-159 cells and xenografted tumors.** (A) Endogenous flotillin-1 palmitoylation detection in SUM-159 cells expressing empty vector GFP (GFP-EV) or GFP-F1 peptide. (B) Flotillin-1 protein expression in SUM-159 cells after 24 hours of 10 µM CPP, 5 µM, or 10 µM CPP-F1 (C) BLI in SUM-159 xenografted tumors expressing either control (F1A) or targeting (F1C) inducible peptide constructs. BLI was expressed as a fold change to week 1 tumor BLI. Doxycycline was administered after palpable tumor formation at week 3 of growth. (D) Representative images of whole body BLI in F1A vs F1C SUM-159 xenografted mice (n=3). Whole tumors are shown below. (C) Box blot depicted the final tumor weights of SUM-159 xenografts.
