# Supplementary material for: Flotillin-1 palmitoylation is essential for its stability and subsequent tumor promoting capabilities
Source: Research Square preprint supplement (doi:10.21203/rs.3.rs-3487749/v1), 2023-10-29
Supplement: Supplementary file 3 [file a5e1dcecc06886f84a822976.xlsx]

## Sheet: General Materials 
Cloning/mutagenisis/lentivirus production	Company	Product number
Monarch Gel extraction kit	New England Biolabs	T1020S
Gene Jet Maxiprep	Thermo Scientific	K0861
NEB HIFI assembly	New England Biolabs	E2621S
SYBR Safe Dye	Invitrogen	S33102
Phusion Green Hot Start II HIFI master mix	Thermo Scientific	F566S
cDNA synthesis Kit	PCR biosystems	PB30.32-02
Superscript IV RT master mix	Invitrogen	11755050
Polybrene	Santa Cruz Biotechnology	sc-134220
Lipofectamine 3000	Invitrogen	L3000015
Puromycin	Invivogen	58-58-2
Hygromycin	TORCIS	4137
Blasticidin	Invivogen	ant-bl-5
Ampicillin	Millipore Sigma	A9518
kanamycin	Millipore Sigma	K1876
lentipac concentrator	Genecopia	LT007
Purelink RNA Mini Kit	Life Technologies	12183020
Cells
MDA-MB-231	ATCC	CRM-HTB-26
MCF-7	ATCC	HTB-22
MCF-10a	ATCC	CRL-10317
SUM 159	Gift from UT health Science Center	Ratna Vadlamudi lab
DH10-B	New England Biolabs	C3019I
NEB STABLE	New England Biolabs	C3040I
Cell Culture
DMEM high glucose	Cytivia	SH30022.01
OPTIMEM	Gibco	31985062
100x Anti-Anti	Gibco	15340062
DMEM/F-12	Gibco	11320033
Fetal Bovine Serum	Cytiva	SH30070.03HI
hEGF	R&D biosystems	236-EG-01M
insulin	R&D biosystems	3435/10
Hydrocortisone	Sigma-Aldrich	H0888
Cholera Toxin A	Sigma-Aldrich	C8052-1MG
mycoplasma PCR detection kit	Southern Biotech	13100-001
Trypsin-EDTA	Gibco	25200056
General Reagents
Click-&-Go protien reaction buffer	Click chemistry tools	1262
Azido Palmitic Acid	Click chemistry tools	1346-5
WS biotin DBCO	Click chemistry tools	A116-1
N-ethylmaleimide	Selleck chemicals	S3692
Benzoase nuclease	Millipore Sigma	E1014
Protein inhibitor cocktail	Thermo Scientific	78430
Hydroxylamine	Millipore Sigma	438227
Biotin-HDPD	Cayman Chemicals	16459
17-octadecynoic acid (17-ODYA)	Cayman Chemicals	90270
Azide-Biotin	Click chemistry tools	1265-5
Strepavidin Magnetic Beads	New England Biolabs	S1420S
Strepavidin Agarose	Millipore Sigma	S1638
Thincert 8uM membrane (invasion chambers)	Greiner-Bio-one	7000396
Rat Tail Collagen I	R&D biosystems	3440-005-01
2-bromopalmitate	Millipore Sigma	238422
DMSO	Sigma-Aldrich	D2650
Cycloheximide	Millipore Sigma	C7698
MG-132	Millipore Sigma	474790
TUBE-Biotin	Life Sensors	UM-0301-0200
Chloroquine	Millipore Sigma	C6628
SuperSignal West Femto Substrate	Thermo Scientific	34094
Pierce BCA protein Assay	Thermo Scientific	23227
Removable chamber slides on glass	Lab Tek	177380
Prolong Gold Antifade with DAPI	Invitrogen	P36931
16% paraformaldehyde	Electron Microscopy Sciences	15710
optimal cutting temperature	Tissue Tek	4583
superfrost Gold plus sllides	Fisher Brand	22-035813
Collegnase A	Millipore Sigma	10103578001
DNAse I	Millipore Sigma	11284932001
ImmPACT DAB substrate Kit	Vector Laboratories	SK-4105
Doxycycyline Chow 200 mg/kg	Bio-Serv	S3888
D-luciferin salt	GOLD BIO	LUCK-1G
Mice Strains
CB17.Cg-PrkdcscidLystbg-J/Crl (SCID beige)	Charles River	strain code: 250
Peptides
CPP (Peptide 1)	Synthesized by Abclonal	ABc61441-1
CPP-F1 (Peptide 2)	Synthesized by Abclonal	ABc61441-2

## Sheet: Antibodies
Type	Target	Species	Company	Dilution	Catalog Number
Primary	GAPDH	Mouse	Invitrogen	1/1000 WB	MA5-15738
Primary	Flotillin-1	Mouse	BD Biosciences	1/500 WB, 1/50 IF	610820
Primary	Flotillin-2	Mouse	BD Biosciences	1/500 WB	610383
Primary	GFP	Rabbit	Cell Signaling Technologies	1/1000 WB	2956
Primary	GFP	Rabbit	Rockland Biosciences	1/100 IF	600-401-215
Primary	RFP	Mouse	Rockland Biosciences	1/100 IF	200-301-379
Primary	Ki67	Mouse	Dako	1/200 IF	M7240
Primary	PARP	Rabbit	Cell Signaling Technologies	1/1000 WB	9532
Primary	DHHC5	Rabbit	Invitrogen	1/1000 WB, 1/50 IF	PA5-53209
Primary	VINCULIN	Rabbit	Cell Signaling Technologies	1/1000 WB	40211
Primary	ATPA1	Mouse	Invitrogen	1/50 IF	MA3-928
Primary	Cleaved-Capase 3	Rabbit	Cell Signaling Technologies	1/50 IHC	9661T
Primary	Calriticulin	Rabbit	Cell Signaling Technologies	1/50 IF	12238T
Primary	EZH2	Rabbit	Cell Signaling Technologies	1/1000 WB	5246T
Primary	Luciferase	Rabbit		1/50 IF
primary	ubiquitin	rabbit	Cell Signaling Technologies	1/1000 WB	20326T
primary	LC3A/B	rabbit	Cell Signaling Technologies	1/1000 WB	12741T
Type	Antibody Conjugate	Species	Company	Dilution	Catalog Number
secondary	HRP	Rabbit	Cell signaling technologies	1/3000 WB	7074
secondary	HRP	Mouse	Cell signaling technologies	1/5000 WB	7076
secondary	Biotynlated rabbit IgG	Rabbit	Dako	1/100 IHC	P0397
secondary	strepavidin-HRP	Rabbit	Dako	1/100 IHC	E0432
secondary	Cy3	Rabbit	Jackson	1/500 IF	711-165-152
secondary	Cy3	Mouse	Jackson	1/750 IF	115-165-003
secondary	FITC	Rabbit	Jackson	1/600 IF	111-095-003
secondary	FITC	Mouse	Jackson	1/750 IF	115-095-003
secondary	Cy5	Rabbit	Invitrogen	1/400 IF	A10523

## Sheet: Vectors
Name	Addgene or millipore sigma (millipore is designated as millipore, addgne is number only)	Use	Lentiviral
dimericTomato-1xwGBD	#176099	PCR input to create dTomato fragment for gibson assemby	yes
pLenti CMV GFP Hygro (656-4)	#17446	backbone vector for subcloning WT-GFP , C34A-dTomato (xbaI-SalI), and flotillin-1 petide (XbaI-BamHI)	yes
pLenti- V6.3 Ultra-Chili	#106173	directly to label C34A cells with dTomato + blast selection	yes
Flotillin-1 shRNA 3 ` UTR	Millipore Sigma, # TRCN0000382434	directly for shRNA againts flotillin-1 3' UTR	yes
pLenti- V6.3 Ultra	#106172	directly to label WT cells with GFP + blast selection	yes
FUW-Luc-mCherry-puro	#183685	used directly to generate luciferase particles with puromycin resistance	yes
p-CMV-EGFP	Gift from Dr. Ryan Gray	empty vector control	no
pEGFP-SF2	#17990	backbone vector for cloning WT and C34A flotilin-1 fragments after removing SRSF-1 ORF (SF2) (hindIII-PstI)	no
shDHHC5 lentivirial particles	Millipore Sigma, # TRCN0000160067	used directly	yes
shzDHHC17 glycerol stock	millipore sigma #TRCN0000137952	used to generate particles directly	yes
shzDHHC 21 glycerol stock	millipore sigma #TRCN0000140807	used to generate particles directly	yes
pLVX-BSD-tet-mEGFP-MIB1	#108542	Bacbone for TRE-inducible peptide digested by XhoI-BamHI	yes
pLX311 Luciferase	#117735	used to generate luciferase particles with blasticidin resistance	yes
			yes

## Sheet: Primers for cloning and PCR
Primers for NEB HIFI Assembly to create flotillin-1-WT-GFP and flotillin-1-C34A-GFP plasmids
Wildtype	Primer 5′ (overlap/spacer/ANNEAL) 3′
Flotillin-1 Forward	ggactcagatctcgagctcatATGTTTTTCACTTGTGGC
Flotillin-1 Reverse	ccgcggtaccgtcgactgcaTCAGGCTGTTCTCAAAGG
Mutagenisis	Primer 5′ (overlap/spacer/ANNEAL (FRAGMENT 1)/ANNEAL (FRAGMENT 2) 3′
For peGFP-C1 vector (from RT full-length cDNA)
Flotillin-1 Fragment 1 Cysteine-34-Alanine Forward	ggactcagatctcgagctcatATGTTTTTCACTTGTGGC
Flotillin-1 Fragment 1 Cysteine-34-Alanine Reverse	TTGGATGCAGGGCAGGACAAAGACACGCCCTCC
Flotillin-1 Fragment 2 Cysteine-34-Alanine Forward	GGGCGTGTCTTTGTCCTGCCCTGCATCCAACAG
Flotillin-1 Fragment 2 Cysteine-34-Alanine Reverse	ccgcggtaccgtcgactgcaTCAGGCTGTTCTCAAAGG
RT-PCR primers	(5'-3')
GAPDH Forward	GTCTCCTCTGACTTCAACAGCG
GAPDH Reverse	ACCACCCTGTTGCTGTAGCCAA
zDHHC 17 Forward	TGGATCAACTTGGAGGGGAC
zDHHC 17 Reverse	TTTTGCTTGCCTTGCCTCTT
zDHHC 21 Forward	CACTTGTTACATAATTCCCAGAACT
zDHHC 21 Reverse	GGCCTCCATAACTGATCCAG
Actin Forward	CACCATTGGCAATGAGCGGTTC
Actin Reverse	AGGTCTTTGCGGATGTCCACGT

## Sheet: primers for subcloning 
40 bp overlap for BamHI and SalI Digested Vector and flotillin-1 C34A ORF
CACGCTGTTTTGACCTCCATAGAAGACACCGACTCTAGAGGCCACCATGGTGAGCAAGGGCGAG-F
GGGCCACAAGTGAAAAACATGTACAGCTCGTCCATGCC-R
for generating dTom fragment
40 bp overlap for BamHI and SalI Digested Vector and dTomato fragment
ACGGCATGGACGAGCTGTACATGTTTTTCACTTGT-F
AGTCAATCTTTCACAAATTTTGTAATCCAGAGGTTGATTGTCAGGCTGTTCTCAAAGGCTTGTG-R
for amplifying -flotillin-1 -C34A ORF from flotillin-1-C34A-GFP plasmid
40 bp overlap for BamHI and SalI Digested Vector
CACGCTGTTTTGACCTCCATAGAAGACACCGACTCTAGAGGCCACCATGGTGAGCAAGG- F
AGTCAATCTTTCACAAATTTTGTAATCCAGAGGTTGATTGTCAGGCTGTTCTCAAAGGCTTGTG-R
for generating flotillin-1-GFP fragmetn from flotillin-1-GFP plasmid

## Sheet: gBLOCKs FOR PEPTIDE CONSTRRUCTS
GBLOCKS (USED DIRECTLY FOR GIBSON ASSEMBLY FRAGMENTS (all 5'-3' + 40 bp homology to respected digested vector)
Synthetic DNA with 40 bp homology to BAMHI-XBAI digested pCMV-GFP-hyg vector
GTTTTGACCTCCATAGAAGACACCGACTCCAGTCATGGTGGCTGGAGGGCGTGTCTTTGTCCTGCCCTGCATCCAACAGATCCAGAGGACACCGGTCGCCACCATGGTGAGCAAGGGCGAGGAGCTG
Control C34A peptide for dox-inducible vector xhoI-BamHI digested addgene #108542
CTCTCGGCATGGACGAGCTGTACAAGTCCGGACTCAGATCAATGGTGGCTGGAGGGCGTGTCTTTGTCCTGCCCGCAATCCAACAGATCCAGAGGATCTAACTTGAAAGGAGTGGGAATTGGCTCCGGTGCCCGTCAGTGG
WT peptide for dox-inducible vector xhoI-BamHI digested addgene #108542
CTCTCGGCATGGACGAGCTGTACAAGTCCGGACTCAGATCAATGGTGGCTGGAGGGCGTGTCTTTGTCCTGCCCTGCATCCAACAGATCCAGAGGATCTAACTTGAAAGGAGTGGGAATTGGCTCCGGTGCCCGTCAGTGG
